# Supplementary material for: Population Pharmacokinetics and Dose Optimization of Ganciclovir in Critically Ill Children
Source: PubMed Central journal article supplement (PMC7847843; doi:10.3389/fphar.2020.614164), 2021-01-18
Supplement: datasheet1.pdf [file datasheet1.pdf]

## Supplementary material

Table S1 Multivariate logistic regression analyzing the influence of GCV exposure on the incidence of neutropenia

| Parameters                  | Crude OR (95% CI)  | <i>p</i> -value | Adjusted OR <sup>a</sup> (95% CI) | <i>p</i> -value |
|-----------------------------|--------------------|-----------------|-----------------------------------|-----------------|
| $C_{min}$                   | 0.833(0.262-2.646) | 0.756           | 0.798(0.254-2.504)                | 0.699           |
| $C_{max}$                   | 0.912(0.733-1.135) | 0.409           | 0.918(0.735-1.146)                | 0.449           |
| $AUC_{0-24}$                | 1.033(0.957-1.116) | 0.401           | 1.038(0.958-1.125)                | 0.359           |
| $Tc > 0.025 \mu\text{g/mL}$ | 1.170(0.926-1.480) | 0.189           | 1.170(0.923-1.485)                | 0.195           |
| $Tc > 0.1 \mu\text{g/mL}$   | 1.099(0.919-1.314) | 0.300           | 1.097(0.915-1.314)                | 0.317           |
| $Tc > 0.2 \mu\text{g/mL}$   | 1.071(0.905-1.266) | 0.425           | 1.066(0.900-1.264)                | 0.459           |
| $Tc > 0.5 \mu\text{g/mL}$   | 1.102(0.905-1.343) | 0.333           | 1.102(0.901-1.347)                | 0.344           |
| $Tc > 1.0 \mu\text{g/mL}$   | 1.210(0.881-1.663) | 0.239           | 1.209(0.869-1.682)                | 0.260           |
| $Tc > 1.5 \mu\text{g/mL}$   | 1.037(0.854-1.261) | 0.712           | 1.027(0.840-1.256)                | 0.797           |

<sup>a</sup> Adjusted by gender, age, and body weight.

OR, odds ratio;  $C_{min}$ , trough concentration;  $C_{max}$ , peak concentration,  $AUC_{0-24}$ , the area under drug plasma concentration-time curve over 24 hours;  $Tc > 0.025-1.5 \mu\text{g/mL}$ , the time above GCV concentration of 0.025 to 1.5  $\mu\text{g/mL}$ .

Table S2 Chi-square tests analyzing the effects of different trough concentration levels on the incidence of neutropenia

| $C_{min}$ ( $\mu\text{g/mL}$ ) | No neutropenia (n=84) | Neutropenia (n=20) | $\chi^2$ | <i>p</i> -value |
|--------------------------------|-----------------------|--------------------|----------|-----------------|
| >0.01                          | 54                    | 15                 | 0.831    | 0.362           |
| >0.02                          | 47                    | 14                 | 1.314    | 0.252           |
| >0.025                         | 43                    | 14                 | 2.307    | 0.129           |
| >0.03                          | 43                    | 13                 | 1.240    | 0.266           |
| >0.05                          | 38                    | 11                 | 0.618    | 0.432           |
| >0.1                           | 30                    | 7                  | 0.004    | 0.952           |
| >0.15                          | 22                    | 5                  | 0.012    | 0.913           |
| >0.3                           | 13                    | 4                  | 0.242    | 0.623           |
| >0.5                           | 5                     | 2                  | 0.422    | 0.516           |

$C_{min}$ , trough concentration.
